# Supplementary material for: Combining photothermal therapy and immunotherapy against melanoma by polydopamine-coated Al2O3 nanoparticles
Source: PubMed Central journal article supplement — Theranostics. 2018 Mar 8;8(8):2229–41. doi: 10.7150/thno.24073 (PMC5928883; doi:10.7150/thno.24073), 2018-03-08
Supplement: thnov08p2229s1.pdf [file thnov08p2229s1.pdf]

# Supplementary file

**Combining photothermal therapy and immunotherapy against melanoma by polydopamine-coated Al<sub>2</sub>O<sub>3</sub> nanoparticles**

*Wenfei Chen, Ming Qin, Xiaoyan Chen, Qin Wang, Zhirong Zhang and Xun Sun\**

Key Laboratory of Drug Targeting and Drug Delivery Systems, Ministry of Education, West China School of Pharmacy, Sichuan University

No.17, Block 3, Southern Renmin Road, Chengdu, 610041, P. R. China

**\* Corresponding author:**

E-mail: [sunxun@scu.edu.cn](mailto:sunxun@scu.edu.cn)

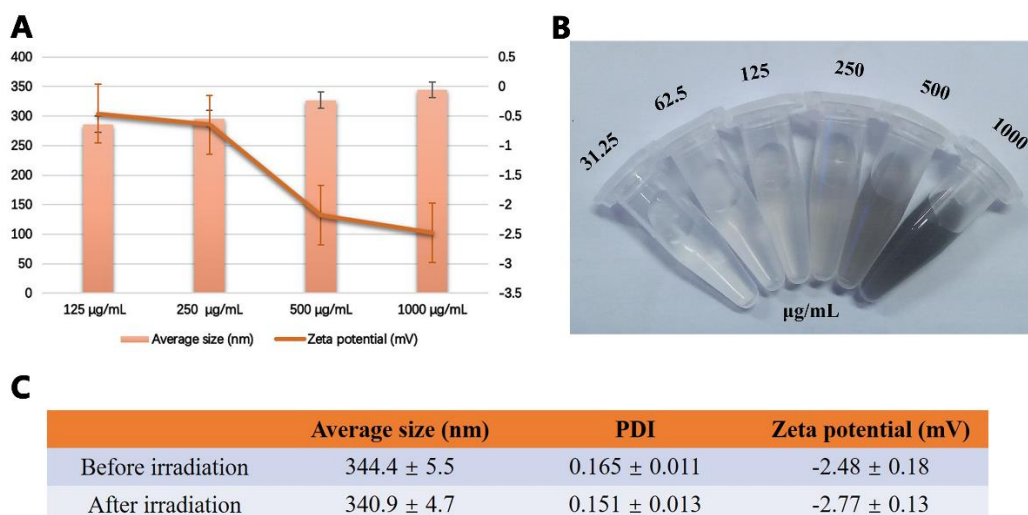

**Figure S1. Characterization of pD-Al<sub>2</sub>O<sub>3</sub> nanoparticles.** (A) Average sizes and zeta potentials of pD-Al<sub>2</sub>O<sub>3</sub> nanoparticles at various concentrations. (B) Photograph of pD-Al<sub>2</sub>O<sub>3</sub> nanoparticles synthesized with the indicated concentrations of dopamine. (C) Average sizes, PDI and zeta potentials of pD-Al<sub>2</sub>O<sub>3</sub> nanoparticles at 1,000 µg/mL before or after irradiation at 1.18 W/cm<sup>2</sup> for 300 s.

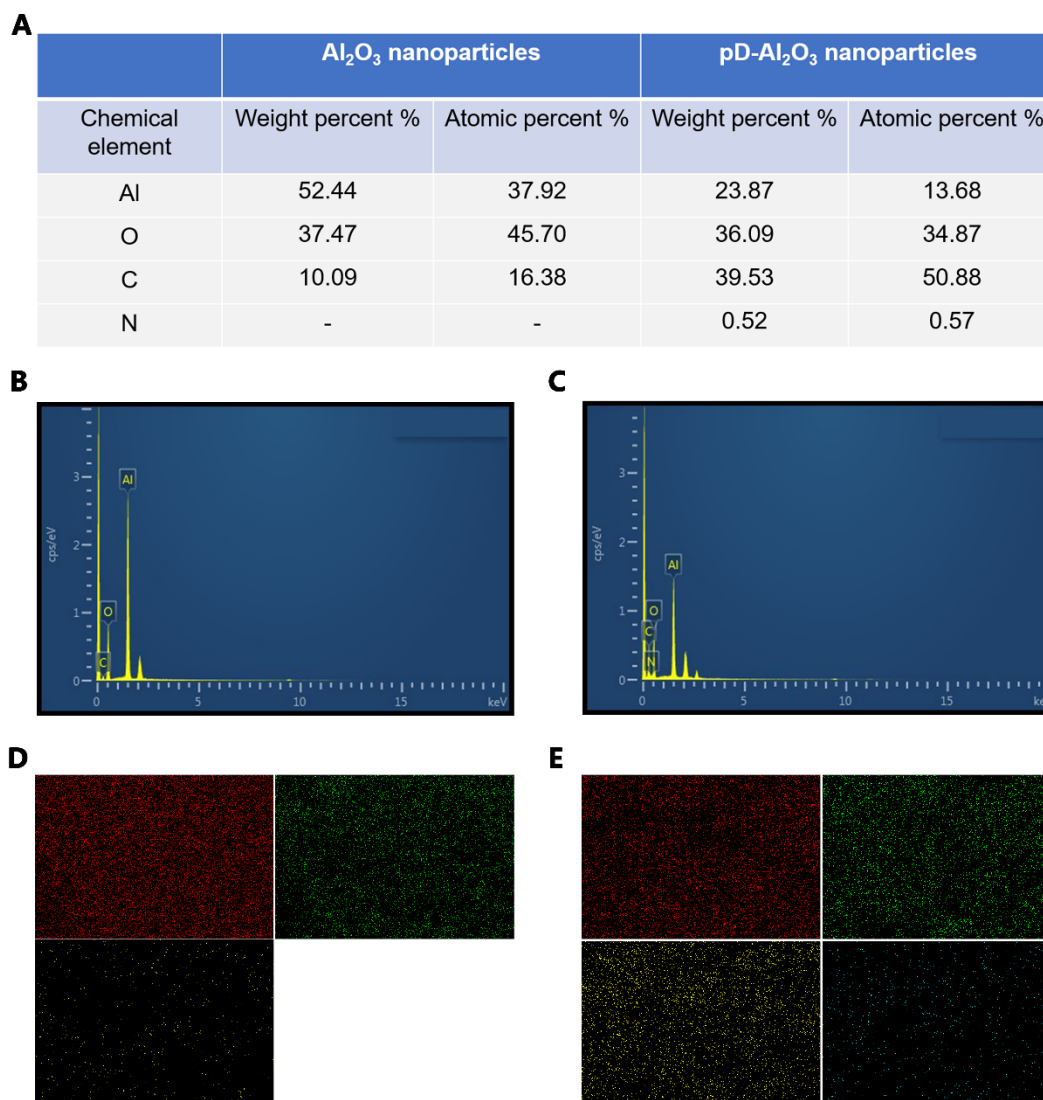

**Figure S2. Interactions between Al<sub>2</sub>O<sub>3</sub> nanoparticles and polydopamine.** (A) We analyzed the weight percent and atomic percent (%) of four chemical elements (Al, O, C, N) in our Al<sub>2</sub>O<sub>3</sub> and pD-Al<sub>2</sub>O<sub>3</sub> nanoparticles by EDX mapping. Spectrogram for Al, O, C and N in Al<sub>2</sub>O<sub>3</sub> (B) and pD-Al<sub>2</sub>O<sub>3</sub> (C) nanoparticles. Element mapping for Al (red), O (green), C (yellow) and N (blue) in Al<sub>2</sub>O<sub>3</sub> (D) and pD-Al<sub>2</sub>O<sub>3</sub> (E) nanoparticles.

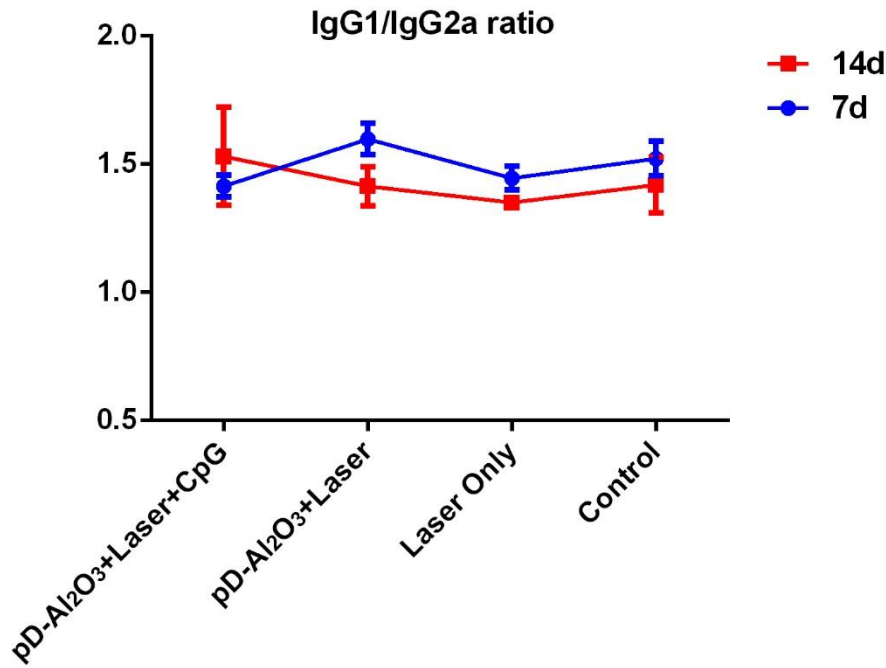

**Figure S3.** The ratio of IgG1/IgG2a *in vivo*. We calculated the IgG1/IgG2a ratio as an indicator of Th1/Th2 immune responses.

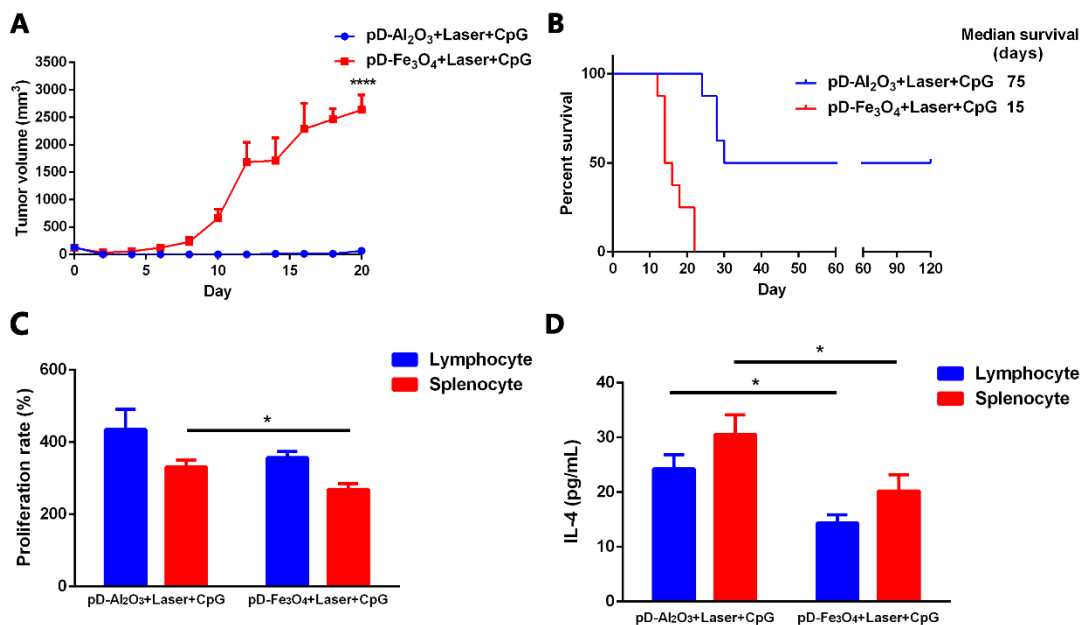

**Figure S4.** Comparison of anti-tumor effects and immune responses induced by pD-Al<sub>2</sub>O<sub>3</sub> or pD-Fe<sub>3</sub>O<sub>4</sub> nanoparticles *in vivo*. Animals were exposed to the combination therapy of PTT followed by immunotherapy in the presence of CpG. (A) Tumor growth (8 mice per group). (B) Survival of mice (8 mice per group). (C) Proliferation rates of lymphocytes and splenocytes from mice treated as indicated. (D) Levels of IL-4 in the supernatants of cultures of lymphocytes and splenocytes cultures, based on ELISA.

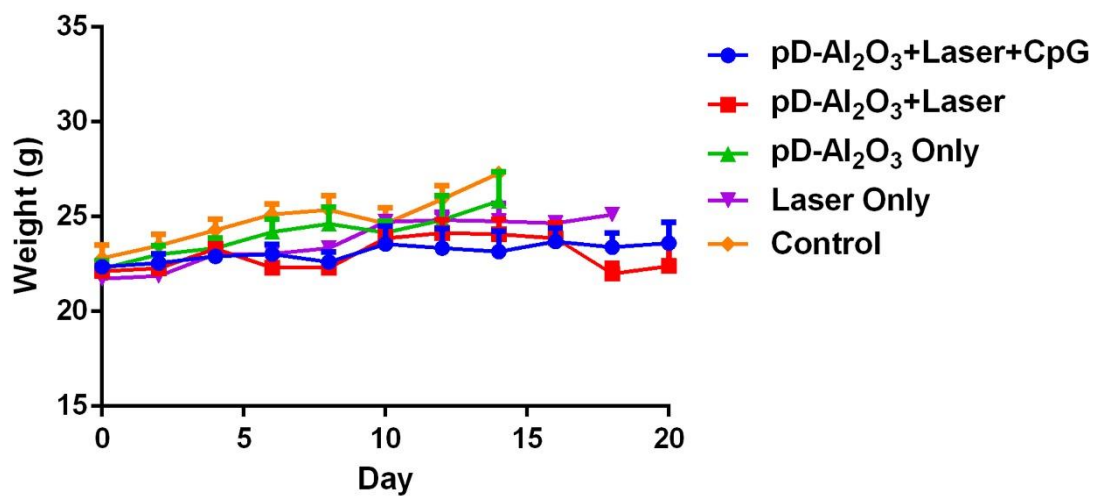

**Figure S5. Toxicity of pD-Al<sub>2</sub>O<sub>3</sub> nanoparticles *in vivo*.** Mouse body weight was measured after the indicated treatments (8 mice per group).
